# Supplementary material for: Oral-Health-Related Quality of Life as Measured with the Child-OIDP Index and Oral Health Status in Spanish Adolescents
Source: Int J Environ Res Public Health. 2022 Sep 29;19(19):12450. doi: 10.3390/ijerph191912450 (PMC9564813; doi:10.3390/ijerph191912450)
Supplement: Supplementary file 1 [file ijerph-19-12450-s001.zip › ijerph-1932941-supplementary.pdf]

## CHILD-OIDP QUESTIONNAIRE

Please answer the following questions and mark with a cross what is right:

**1.- In the last three months, have you had problems eating (meals, ice creams,...) due to teeth pain?**

- ☐ Yes  
☐ No

If your answer is YES:

How has this problem affected your life?

- ☐ Almost nothing    ☐ Something    ☐ A Lot

How many times have you had this problem?

- ☐ Once or twice a month  
☐ Three or more times a month, or once or twice a week  
☐ Three or more per week

If you have had this problem eating less than once a month, during how many days occurred it in total?

- ☐ 1-7 days  
☐ 8-15 days  
☐ 15 days or more

Mark with a cross what you think has kept you from eating well in the last few months:

- |                                                                          |                                                               |
|--------------------------------------------------------------------------|---------------------------------------------------------------|
| <input type="checkbox"/> Teeth pain                                      | <input type="checkbox"/> Bleeding gums                        |
| <input type="checkbox"/> Teeth sensitivity                               | <input type="checkbox"/> Swelling of the gums                 |
| <input type="checkbox"/> Decayed teeth                                   | <input type="checkbox"/> Tartar                               |
| <input type="checkbox"/> Baby teeth that have fallen out                 | <input type="checkbox"/> Mouth sores                          |
| <input type="checkbox"/> Hollows because the baby teeth did not come out | <input type="checkbox"/> Bad breath                           |
| <input type="checkbox"/> Fractures of definitive teeth                   | <input type="checkbox"/> Lump on the face                     |
| <input type="checkbox"/> Changes in tooth color                          | <input type="checkbox"/> Emergence of teeth                   |
| <input type="checkbox"/> Problems in size or shape                       | <input type="checkbox"/> Some definitive tooth has fallen out |
| <input type="checkbox"/> Crooked teeth                                   | <input type="checkbox"/> Others                               |

**5.- Have you been angry or annoyed in these last three months because your teeth hurt or you had a problem in your mouth?**

- ☐ Yes  
☐ No

If your answer is YES:

How has this problem affected your life?

- ☐ Almost nothing    ☐ Something    ☐ A Lot

How many times have you had this problem?

- ☐ Once or twice a month  
☐ Three or more times a month, or once or twice a week  
☐ Three or more per week

If you have had this problem in your mouth less than once a month, during how many days occurred it in total?

- ☐ 1-7 days  
☐ 8-15 days  
☐ 15 days or more

Mark with a cross what you think has kept you from eating well in the last few months:

- |                                                                          |                                                               |
|--------------------------------------------------------------------------|---------------------------------------------------------------|
| <input type="checkbox"/> Teeth pain                                      | <input type="checkbox"/> Bleeding gums                        |
| <input type="checkbox"/> Teeth sensitivity                               | <input type="checkbox"/> Swelling of the gums                 |
| <input type="checkbox"/> Decayed teeth                                   | <input type="checkbox"/> Tartar                               |
| <input type="checkbox"/> Baby teeth that have fallen out                 | <input type="checkbox"/> Mouth sores                          |
| <input type="checkbox"/> Hollows because the baby teeth did not come out | <input type="checkbox"/> Bad breath                           |
| <input type="checkbox"/> Fractures of definitive teeth                   | <input type="checkbox"/> Lump on the face                     |
| <input type="checkbox"/> Changes in tooth color                          | <input type="checkbox"/> Emergence of teeth                   |
| <input type="checkbox"/> Problems in size or shape                       | <input type="checkbox"/> Some definitive tooth has fallen out |
| <input type="checkbox"/> Crooked teeth                                   | <input type="checkbox"/> Others                               |

**2.-Have you had problems speaking clearly and pronouncing well in these last three months due to problems in the mouth?**

- ☐ Yes  
☐ No

If your answer is YES:

How has this problem affected your life?

- ☐ Almost nothing    ☐ Something    ☐ A Lot

How many times have you had this problem?

- ☐ Once or twice a month  
☐ Three or more times a month, or once or twice a week  
☐ Three or more per week

If you have had this problem speaking less than once a month, during how many days occurred it in total?

- ☐ 1-7 days  
☐ 8-15 days  
☐ 15 days or more

Mark with a cross what you think has kept you from speaking well in the last few months:

- |                                                                          |                                                               |
|--------------------------------------------------------------------------|---------------------------------------------------------------|
| <input type="checkbox"/> Teeth pain                                      | <input type="checkbox"/> Bleeding gums                        |
| <input type="checkbox"/> Teeth sensitivity                               | <input type="checkbox"/> Swelling of the gums                 |
| <input type="checkbox"/> Decayed teeth                                   | <input type="checkbox"/> Tartar                               |
| <input type="checkbox"/> Baby teeth that have fallen out                 | <input type="checkbox"/> Mouth sores                          |
| <input type="checkbox"/> Hollows because the baby teeth did not come out | <input type="checkbox"/> Bad breath                           |
| <input type="checkbox"/> Fractures of definitive teeth                   | <input type="checkbox"/> Lump on the face                     |
| <input type="checkbox"/> Changes in tooth color                          | <input type="checkbox"/> Emergence of teeth                   |
| <input type="checkbox"/> Problems in size or shape                       | <input type="checkbox"/> Some definitive tooth has fallen out |
| <input type="checkbox"/> Crooked teeth                                   | <input type="checkbox"/> Others                               |

**6.- Have you been embarrassed to smile or show your teeth in these last three months because you do not like them?**

- ☐ Yes  
☐ No

If your answer is YES:

How has this problem affected your life?

- ☐ Almost nothing    ☐ Something    ☐ A Lot

How many times have you had this problem?

- ☐ Once or twice a month  
☐ Three or more times a month, or once or twice a week  
☐ Three or more per week

If you have had this problem smiling less than once a month, during how many days occurred it in total?

- ☐ 1-7 days  
☐ 8-15 days  
☐ 15 days or more

Mark with a cross what you think has kept you from smiling and showing your teeth in the last few months:

- |                                                                          |                                                               |
|--------------------------------------------------------------------------|---------------------------------------------------------------|
| <input type="checkbox"/> Teeth pain                                      | <input type="checkbox"/> Bleeding gums                        |
| <input type="checkbox"/> Teeth sensitivity                               | <input type="checkbox"/> Swelling of the gums                 |
| <input type="checkbox"/> Decayed teeth                                   | <input type="checkbox"/> Tartar                               |
| <input type="checkbox"/> Baby teeth that have fallen out                 | <input type="checkbox"/> Mouth sores                          |
| <input type="checkbox"/> Hollows because the baby teeth did not come out | <input type="checkbox"/> Bad breath                           |
| <input type="checkbox"/> Fractures of definitive teeth                   | <input type="checkbox"/> Lump on the face                     |
| <input type="checkbox"/> Changes in tooth color                          | <input type="checkbox"/> Emergence of teeth                   |
| <input type="checkbox"/> Problems in size or shape                       | <input type="checkbox"/> Some definitive tooth has fallen out |
| <input type="checkbox"/> Crooked teeth                                   | <input type="checkbox"/> Others                               |

**3.-Have you been able to brush and rinse your teeth well during these last three months?**

- ☐ Yes  
☐ No

If your answer is YES:

How has this problem affected your life?

- ☐ Almost nothing    ☐ Something    ☐ A Lot

How many times have you had this problem?

- ☐ Once or twice a month  
☐ Three or more times a month, or once or twice a week  
☐ Three or more per week

**7.- Have you ever had to stop doing homework or housework, or not go to school because your teeth hurt in these last three months?**

- ☐ Yes  
☐ No

If your answer is YES:

How has this problem affected your life?

- ☐ Almost nothing    ☐ Something    ☐ A Lot

How many times have you had this problem?

- ☐ Once or twice a month  
☐ Three or more times a month, or once or twice a week  
☐ Three or more per week

|                                                                                                                                                                                                                                                                                                                                                                                                                                                                                                                                                                                                                                                                                                                                                                                                                                                                                                                                                                                                                                                                                                                                                                                                                                                                                                                                                                                                                                                                                                                                                                                                                                                                                                                                                                                                                                                                                                                                                                                                                                                                                                                                                                                                                                          |                                                               |                                        |                                            |                                               |                                        |                                 |                                                          |                                      |                                                                          |                                     |                                                        |                                           |                                                 |                                             |                                                    |                                                               |                                        |                                 |                                                                                                                                                                                                                                                                                                                                                                                                                                                                                                                                                                                                                                                                                                                                                                                                                                                                                                                                                                                                                                                                                                                                                                                                                                                                                                                                                                                                                                                                                                                                                                                                                                                                                                                                                                                                                                                                                                                                                                                                                                                                                                                                                                                                                             |                                     |                                        |                                            |                                               |                                        |                                 |                                                          |                                      |                                                                          |                                     |                                                        |                                           |                                                 |                                             |                                                    |                                                               |                                        |                                 |
|------------------------------------------------------------------------------------------------------------------------------------------------------------------------------------------------------------------------------------------------------------------------------------------------------------------------------------------------------------------------------------------------------------------------------------------------------------------------------------------------------------------------------------------------------------------------------------------------------------------------------------------------------------------------------------------------------------------------------------------------------------------------------------------------------------------------------------------------------------------------------------------------------------------------------------------------------------------------------------------------------------------------------------------------------------------------------------------------------------------------------------------------------------------------------------------------------------------------------------------------------------------------------------------------------------------------------------------------------------------------------------------------------------------------------------------------------------------------------------------------------------------------------------------------------------------------------------------------------------------------------------------------------------------------------------------------------------------------------------------------------------------------------------------------------------------------------------------------------------------------------------------------------------------------------------------------------------------------------------------------------------------------------------------------------------------------------------------------------------------------------------------------------------------------------------------------------------------------------------------|---------------------------------------------------------------|----------------------------------------|--------------------------------------------|-----------------------------------------------|----------------------------------------|---------------------------------|----------------------------------------------------------|--------------------------------------|--------------------------------------------------------------------------|-------------------------------------|--------------------------------------------------------|-------------------------------------------|-------------------------------------------------|---------------------------------------------|----------------------------------------------------|---------------------------------------------------------------|----------------------------------------|---------------------------------|-----------------------------------------------------------------------------------------------------------------------------------------------------------------------------------------------------------------------------------------------------------------------------------------------------------------------------------------------------------------------------------------------------------------------------------------------------------------------------------------------------------------------------------------------------------------------------------------------------------------------------------------------------------------------------------------------------------------------------------------------------------------------------------------------------------------------------------------------------------------------------------------------------------------------------------------------------------------------------------------------------------------------------------------------------------------------------------------------------------------------------------------------------------------------------------------------------------------------------------------------------------------------------------------------------------------------------------------------------------------------------------------------------------------------------------------------------------------------------------------------------------------------------------------------------------------------------------------------------------------------------------------------------------------------------------------------------------------------------------------------------------------------------------------------------------------------------------------------------------------------------------------------------------------------------------------------------------------------------------------------------------------------------------------------------------------------------------------------------------------------------------------------------------------------------------------------------------------------------|-------------------------------------|----------------------------------------|--------------------------------------------|-----------------------------------------------|----------------------------------------|---------------------------------|----------------------------------------------------------|--------------------------------------|--------------------------------------------------------------------------|-------------------------------------|--------------------------------------------------------|-------------------------------------------|-------------------------------------------------|---------------------------------------------|----------------------------------------------------|---------------------------------------------------------------|----------------------------------------|---------------------------------|
| <p>If you have had this problem to brush your teeth less than once a month, during how many days occurred it in total?</p> <p> <input type="checkbox"/> 1-7 days<br/> <input type="checkbox"/> 8-15 days<br/> <input type="checkbox"/> 15 days or more         </p> <p>Mark with a cross what you think has kept you from brushing your teeth well in the last few months:</p> <table style="width: 100%;"> <tr> <td><input type="checkbox"/> Teeth pain</td> <td><input type="checkbox"/> Bleeding gums</td> </tr> <tr> <td><input type="checkbox"/> Teeth sensitivity</td> <td><input type="checkbox"/> Swelling of the gums</td> </tr> <tr> <td><input type="checkbox"/> Decayed teeth</td> <td><input type="checkbox"/> Tartar</td> </tr> <tr> <td><input type="checkbox"/> Baby teeth that have fallen out</td> <td><input type="checkbox"/> Mouth sores</td> </tr> <tr> <td><input type="checkbox"/> Hollows because the baby teeth did not come out</td> <td><input type="checkbox"/> Bad breath</td> </tr> <tr> <td><input type="checkbox"/> Fractures of definitive teeth</td> <td><input type="checkbox"/> Lump on the face</td> </tr> <tr> <td><input type="checkbox"/> Changes in tooth color</td> <td><input type="checkbox"/> Emergence of teeth</td> </tr> <tr> <td><input type="checkbox"/> Problems in size or shape</td> <td><input type="checkbox"/> Some definitive tooth has fallen out</td> </tr> <tr> <td><input type="checkbox"/> Crooked teeth</td> <td><input type="checkbox"/> Others</td> </tr> </table>                                                                                                                                                                                                                                                                                                                                                                                                                                                                                                                                                                                                                                                                                                     | <input type="checkbox"/> Teeth pain                           | <input type="checkbox"/> Bleeding gums | <input type="checkbox"/> Teeth sensitivity | <input type="checkbox"/> Swelling of the gums | <input type="checkbox"/> Decayed teeth | <input type="checkbox"/> Tartar | <input type="checkbox"/> Baby teeth that have fallen out | <input type="checkbox"/> Mouth sores | <input type="checkbox"/> Hollows because the baby teeth did not come out | <input type="checkbox"/> Bad breath | <input type="checkbox"/> Fractures of definitive teeth | <input type="checkbox"/> Lump on the face | <input type="checkbox"/> Changes in tooth color | <input type="checkbox"/> Emergence of teeth | <input type="checkbox"/> Problems in size or shape | <input type="checkbox"/> Some definitive tooth has fallen out | <input type="checkbox"/> Crooked teeth | <input type="checkbox"/> Others | <p>If you have had this problem to do homework less than once a month, during how many days occurred it in total?</p> <p> <input type="checkbox"/> 1-7 days<br/> <input type="checkbox"/> 8-15 days<br/> <input type="checkbox"/> 15 days or more         </p> <p>Mark with a cross what you think has kept you from doing homework or going to school in the last few months:</p> <table style="width: 100%;"> <tr> <td><input type="checkbox"/> Teeth pain</td> <td><input type="checkbox"/> Bleeding gums</td> </tr> <tr> <td><input type="checkbox"/> Teeth sensitivity</td> <td><input type="checkbox"/> Swelling of the gums</td> </tr> <tr> <td><input type="checkbox"/> Decayed teeth</td> <td><input type="checkbox"/> Tartar</td> </tr> <tr> <td><input type="checkbox"/> Baby teeth that have fallen out</td> <td><input type="checkbox"/> Mouth sores</td> </tr> <tr> <td><input type="checkbox"/> Hollows because the baby teeth did not come out</td> <td><input type="checkbox"/> Bad breath</td> </tr> <tr> <td><input type="checkbox"/> Fractures of definitive teeth</td> <td><input type="checkbox"/> Lump on the face</td> </tr> <tr> <td><input type="checkbox"/> Changes in tooth color</td> <td><input type="checkbox"/> Emergence of teeth</td> </tr> <tr> <td><input type="checkbox"/> Problems in size or shape</td> <td><input type="checkbox"/> Some definitive tooth has fallen out</td> </tr> <tr> <td><input type="checkbox"/> Crooked teeth</td> <td><input type="checkbox"/> Others</td> </tr> </table>                                                                                                                                                                                                                                                                                                                                                                                                                                                                                                                                                                                                                                                                                    | <input type="checkbox"/> Teeth pain | <input type="checkbox"/> Bleeding gums | <input type="checkbox"/> Teeth sensitivity | <input type="checkbox"/> Swelling of the gums | <input type="checkbox"/> Decayed teeth | <input type="checkbox"/> Tartar | <input type="checkbox"/> Baby teeth that have fallen out | <input type="checkbox"/> Mouth sores | <input type="checkbox"/> Hollows because the baby teeth did not come out | <input type="checkbox"/> Bad breath | <input type="checkbox"/> Fractures of definitive teeth | <input type="checkbox"/> Lump on the face | <input type="checkbox"/> Changes in tooth color | <input type="checkbox"/> Emergence of teeth | <input type="checkbox"/> Problems in size or shape | <input type="checkbox"/> Some definitive tooth has fallen out | <input type="checkbox"/> Crooked teeth | <input type="checkbox"/> Others |
| <input type="checkbox"/> Teeth pain                                                                                                                                                                                                                                                                                                                                                                                                                                                                                                                                                                                                                                                                                                                                                                                                                                                                                                                                                                                                                                                                                                                                                                                                                                                                                                                                                                                                                                                                                                                                                                                                                                                                                                                                                                                                                                                                                                                                                                                                                                                                                                                                                                                                      | <input type="checkbox"/> Bleeding gums                        |                                        |                                            |                                               |                                        |                                 |                                                          |                                      |                                                                          |                                     |                                                        |                                           |                                                 |                                             |                                                    |                                                               |                                        |                                 |                                                                                                                                                                                                                                                                                                                                                                                                                                                                                                                                                                                                                                                                                                                                                                                                                                                                                                                                                                                                                                                                                                                                                                                                                                                                                                                                                                                                                                                                                                                                                                                                                                                                                                                                                                                                                                                                                                                                                                                                                                                                                                                                                                                                                             |                                     |                                        |                                            |                                               |                                        |                                 |                                                          |                                      |                                                                          |                                     |                                                        |                                           |                                                 |                                             |                                                    |                                                               |                                        |                                 |
| <input type="checkbox"/> Teeth sensitivity                                                                                                                                                                                                                                                                                                                                                                                                                                                                                                                                                                                                                                                                                                                                                                                                                                                                                                                                                                                                                                                                                                                                                                                                                                                                                                                                                                                                                                                                                                                                                                                                                                                                                                                                                                                                                                                                                                                                                                                                                                                                                                                                                                                               | <input type="checkbox"/> Swelling of the gums                 |                                        |                                            |                                               |                                        |                                 |                                                          |                                      |                                                                          |                                     |                                                        |                                           |                                                 |                                             |                                                    |                                                               |                                        |                                 |                                                                                                                                                                                                                                                                                                                                                                                                                                                                                                                                                                                                                                                                                                                                                                                                                                                                                                                                                                                                                                                                                                                                                                                                                                                                                                                                                                                                                                                                                                                                                                                                                                                                                                                                                                                                                                                                                                                                                                                                                                                                                                                                                                                                                             |                                     |                                        |                                            |                                               |                                        |                                 |                                                          |                                      |                                                                          |                                     |                                                        |                                           |                                                 |                                             |                                                    |                                                               |                                        |                                 |
| <input type="checkbox"/> Decayed teeth                                                                                                                                                                                                                                                                                                                                                                                                                                                                                                                                                                                                                                                                                                                                                                                                                                                                                                                                                                                                                                                                                                                                                                                                                                                                                                                                                                                                                                                                                                                                                                                                                                                                                                                                                                                                                                                                                                                                                                                                                                                                                                                                                                                                   | <input type="checkbox"/> Tartar                               |                                        |                                            |                                               |                                        |                                 |                                                          |                                      |                                                                          |                                     |                                                        |                                           |                                                 |                                             |                                                    |                                                               |                                        |                                 |                                                                                                                                                                                                                                                                                                                                                                                                                                                                                                                                                                                                                                                                                                                                                                                                                                                                                                                                                                                                                                                                                                                                                                                                                                                                                                                                                                                                                                                                                                                                                                                                                                                                                                                                                                                                                                                                                                                                                                                                                                                                                                                                                                                                                             |                                     |                                        |                                            |                                               |                                        |                                 |                                                          |                                      |                                                                          |                                     |                                                        |                                           |                                                 |                                             |                                                    |                                                               |                                        |                                 |
| <input type="checkbox"/> Baby teeth that have fallen out                                                                                                                                                                                                                                                                                                                                                                                                                                                                                                                                                                                                                                                                                                                                                                                                                                                                                                                                                                                                                                                                                                                                                                                                                                                                                                                                                                                                                                                                                                                                                                                                                                                                                                                                                                                                                                                                                                                                                                                                                                                                                                                                                                                 | <input type="checkbox"/> Mouth sores                          |                                        |                                            |                                               |                                        |                                 |                                                          |                                      |                                                                          |                                     |                                                        |                                           |                                                 |                                             |                                                    |                                                               |                                        |                                 |                                                                                                                                                                                                                                                                                                                                                                                                                                                                                                                                                                                                                                                                                                                                                                                                                                                                                                                                                                                                                                                                                                                                                                                                                                                                                                                                                                                                                                                                                                                                                                                                                                                                                                                                                                                                                                                                                                                                                                                                                                                                                                                                                                                                                             |                                     |                                        |                                            |                                               |                                        |                                 |                                                          |                                      |                                                                          |                                     |                                                        |                                           |                                                 |                                             |                                                    |                                                               |                                        |                                 |
| <input type="checkbox"/> Hollows because the baby teeth did not come out                                                                                                                                                                                                                                                                                                                                                                                                                                                                                                                                                                                                                                                                                                                                                                                                                                                                                                                                                                                                                                                                                                                                                                                                                                                                                                                                                                                                                                                                                                                                                                                                                                                                                                                                                                                                                                                                                                                                                                                                                                                                                                                                                                 | <input type="checkbox"/> Bad breath                           |                                        |                                            |                                               |                                        |                                 |                                                          |                                      |                                                                          |                                     |                                                        |                                           |                                                 |                                             |                                                    |                                                               |                                        |                                 |                                                                                                                                                                                                                                                                                                                                                                                                                                                                                                                                                                                                                                                                                                                                                                                                                                                                                                                                                                                                                                                                                                                                                                                                                                                                                                                                                                                                                                                                                                                                                                                                                                                                                                                                                                                                                                                                                                                                                                                                                                                                                                                                                                                                                             |                                     |                                        |                                            |                                               |                                        |                                 |                                                          |                                      |                                                                          |                                     |                                                        |                                           |                                                 |                                             |                                                    |                                                               |                                        |                                 |
| <input type="checkbox"/> Fractures of definitive teeth                                                                                                                                                                                                                                                                                                                                                                                                                                                                                                                                                                                                                                                                                                                                                                                                                                                                                                                                                                                                                                                                                                                                                                                                                                                                                                                                                                                                                                                                                                                                                                                                                                                                                                                                                                                                                                                                                                                                                                                                                                                                                                                                                                                   | <input type="checkbox"/> Lump on the face                     |                                        |                                            |                                               |                                        |                                 |                                                          |                                      |                                                                          |                                     |                                                        |                                           |                                                 |                                             |                                                    |                                                               |                                        |                                 |                                                                                                                                                                                                                                                                                                                                                                                                                                                                                                                                                                                                                                                                                                                                                                                                                                                                                                                                                                                                                                                                                                                                                                                                                                                                                                                                                                                                                                                                                                                                                                                                                                                                                                                                                                                                                                                                                                                                                                                                                                                                                                                                                                                                                             |                                     |                                        |                                            |                                               |                                        |                                 |                                                          |                                      |                                                                          |                                     |                                                        |                                           |                                                 |                                             |                                                    |                                                               |                                        |                                 |
| <input type="checkbox"/> Changes in tooth color                                                                                                                                                                                                                                                                                                                                                                                                                                                                                                                                                                                                                                                                                                                                                                                                                                                                                                                                                                                                                                                                                                                                                                                                                                                                                                                                                                                                                                                                                                                                                                                                                                                                                                                                                                                                                                                                                                                                                                                                                                                                                                                                                                                          | <input type="checkbox"/> Emergence of teeth                   |                                        |                                            |                                               |                                        |                                 |                                                          |                                      |                                                                          |                                     |                                                        |                                           |                                                 |                                             |                                                    |                                                               |                                        |                                 |                                                                                                                                                                                                                                                                                                                                                                                                                                                                                                                                                                                                                                                                                                                                                                                                                                                                                                                                                                                                                                                                                                                                                                                                                                                                                                                                                                                                                                                                                                                                                                                                                                                                                                                                                                                                                                                                                                                                                                                                                                                                                                                                                                                                                             |                                     |                                        |                                            |                                               |                                        |                                 |                                                          |                                      |                                                                          |                                     |                                                        |                                           |                                                 |                                             |                                                    |                                                               |                                        |                                 |
| <input type="checkbox"/> Problems in size or shape                                                                                                                                                                                                                                                                                                                                                                                                                                                                                                                                                                                                                                                                                                                                                                                                                                                                                                                                                                                                                                                                                                                                                                                                                                                                                                                                                                                                                                                                                                                                                                                                                                                                                                                                                                                                                                                                                                                                                                                                                                                                                                                                                                                       | <input type="checkbox"/> Some definitive tooth has fallen out |                                        |                                            |                                               |                                        |                                 |                                                          |                                      |                                                                          |                                     |                                                        |                                           |                                                 |                                             |                                                    |                                                               |                                        |                                 |                                                                                                                                                                                                                                                                                                                                                                                                                                                                                                                                                                                                                                                                                                                                                                                                                                                                                                                                                                                                                                                                                                                                                                                                                                                                                                                                                                                                                                                                                                                                                                                                                                                                                                                                                                                                                                                                                                                                                                                                                                                                                                                                                                                                                             |                                     |                                        |                                            |                                               |                                        |                                 |                                                          |                                      |                                                                          |                                     |                                                        |                                           |                                                 |                                             |                                                    |                                                               |                                        |                                 |
| <input type="checkbox"/> Crooked teeth                                                                                                                                                                                                                                                                                                                                                                                                                                                                                                                                                                                                                                                                                                                                                                                                                                                                                                                                                                                                                                                                                                                                                                                                                                                                                                                                                                                                                                                                                                                                                                                                                                                                                                                                                                                                                                                                                                                                                                                                                                                                                                                                                                                                   | <input type="checkbox"/> Others                               |                                        |                                            |                                               |                                        |                                 |                                                          |                                      |                                                                          |                                     |                                                        |                                           |                                                 |                                             |                                                    |                                                               |                                        |                                 |                                                                                                                                                                                                                                                                                                                                                                                                                                                                                                                                                                                                                                                                                                                                                                                                                                                                                                                                                                                                                                                                                                                                                                                                                                                                                                                                                                                                                                                                                                                                                                                                                                                                                                                                                                                                                                                                                                                                                                                                                                                                                                                                                                                                                             |                                     |                                        |                                            |                                               |                                        |                                 |                                                          |                                      |                                                                          |                                     |                                                        |                                           |                                                 |                                             |                                                    |                                                               |                                        |                                 |
| <input type="checkbox"/> Teeth pain                                                                                                                                                                                                                                                                                                                                                                                                                                                                                                                                                                                                                                                                                                                                                                                                                                                                                                                                                                                                                                                                                                                                                                                                                                                                                                                                                                                                                                                                                                                                                                                                                                                                                                                                                                                                                                                                                                                                                                                                                                                                                                                                                                                                      | <input type="checkbox"/> Bleeding gums                        |                                        |                                            |                                               |                                        |                                 |                                                          |                                      |                                                                          |                                     |                                                        |                                           |                                                 |                                             |                                                    |                                                               |                                        |                                 |                                                                                                                                                                                                                                                                                                                                                                                                                                                                                                                                                                                                                                                                                                                                                                                                                                                                                                                                                                                                                                                                                                                                                                                                                                                                                                                                                                                                                                                                                                                                                                                                                                                                                                                                                                                                                                                                                                                                                                                                                                                                                                                                                                                                                             |                                     |                                        |                                            |                                               |                                        |                                 |                                                          |                                      |                                                                          |                                     |                                                        |                                           |                                                 |                                             |                                                    |                                                               |                                        |                                 |
| <input type="checkbox"/> Teeth sensitivity                                                                                                                                                                                                                                                                                                                                                                                                                                                                                                                                                                                                                                                                                                                                                                                                                                                                                                                                                                                                                                                                                                                                                                                                                                                                                                                                                                                                                                                                                                                                                                                                                                                                                                                                                                                                                                                                                                                                                                                                                                                                                                                                                                                               | <input type="checkbox"/> Swelling of the gums                 |                                        |                                            |                                               |                                        |                                 |                                                          |                                      |                                                                          |                                     |                                                        |                                           |                                                 |                                             |                                                    |                                                               |                                        |                                 |                                                                                                                                                                                                                                                                                                                                                                                                                                                                                                                                                                                                                                                                                                                                                                                                                                                                                                                                                                                                                                                                                                                                                                                                                                                                                                                                                                                                                                                                                                                                                                                                                                                                                                                                                                                                                                                                                                                                                                                                                                                                                                                                                                                                                             |                                     |                                        |                                            |                                               |                                        |                                 |                                                          |                                      |                                                                          |                                     |                                                        |                                           |                                                 |                                             |                                                    |                                                               |                                        |                                 |
| <input type="checkbox"/> Decayed teeth                                                                                                                                                                                                                                                                                                                                                                                                                                                                                                                                                                                                                                                                                                                                                                                                                                                                                                                                                                                                                                                                                                                                                                                                                                                                                                                                                                                                                                                                                                                                                                                                                                                                                                                                                                                                                                                                                                                                                                                                                                                                                                                                                                                                   | <input type="checkbox"/> Tartar                               |                                        |                                            |                                               |                                        |                                 |                                                          |                                      |                                                                          |                                     |                                                        |                                           |                                                 |                                             |                                                    |                                                               |                                        |                                 |                                                                                                                                                                                                                                                                                                                                                                                                                                                                                                                                                                                                                                                                                                                                                                                                                                                                                                                                                                                                                                                                                                                                                                                                                                                                                                                                                                                                                                                                                                                                                                                                                                                                                                                                                                                                                                                                                                                                                                                                                                                                                                                                                                                                                             |                                     |                                        |                                            |                                               |                                        |                                 |                                                          |                                      |                                                                          |                                     |                                                        |                                           |                                                 |                                             |                                                    |                                                               |                                        |                                 |
| <input type="checkbox"/> Baby teeth that have fallen out                                                                                                                                                                                                                                                                                                                                                                                                                                                                                                                                                                                                                                                                                                                                                                                                                                                                                                                                                                                                                                                                                                                                                                                                                                                                                                                                                                                                                                                                                                                                                                                                                                                                                                                                                                                                                                                                                                                                                                                                                                                                                                                                                                                 | <input type="checkbox"/> Mouth sores                          |                                        |                                            |                                               |                                        |                                 |                                                          |                                      |                                                                          |                                     |                                                        |                                           |                                                 |                                             |                                                    |                                                               |                                        |                                 |                                                                                                                                                                                                                                                                                                                                                                                                                                                                                                                                                                                                                                                                                                                                                                                                                                                                                                                                                                                                                                                                                                                                                                                                                                                                                                                                                                                                                                                                                                                                                                                                                                                                                                                                                                                                                                                                                                                                                                                                                                                                                                                                                                                                                             |                                     |                                        |                                            |                                               |                                        |                                 |                                                          |                                      |                                                                          |                                     |                                                        |                                           |                                                 |                                             |                                                    |                                                               |                                        |                                 |
| <input type="checkbox"/> Hollows because the baby teeth did not come out                                                                                                                                                                                                                                                                                                                                                                                                                                                                                                                                                                                                                                                                                                                                                                                                                                                                                                                                                                                                                                                                                                                                                                                                                                                                                                                                                                                                                                                                                                                                                                                                                                                                                                                                                                                                                                                                                                                                                                                                                                                                                                                                                                 | <input type="checkbox"/> Bad breath                           |                                        |                                            |                                               |                                        |                                 |                                                          |                                      |                                                                          |                                     |                                                        |                                           |                                                 |                                             |                                                    |                                                               |                                        |                                 |                                                                                                                                                                                                                                                                                                                                                                                                                                                                                                                                                                                                                                                                                                                                                                                                                                                                                                                                                                                                                                                                                                                                                                                                                                                                                                                                                                                                                                                                                                                                                                                                                                                                                                                                                                                                                                                                                                                                                                                                                                                                                                                                                                                                                             |                                     |                                        |                                            |                                               |                                        |                                 |                                                          |                                      |                                                                          |                                     |                                                        |                                           |                                                 |                                             |                                                    |                                                               |                                        |                                 |
| <input type="checkbox"/> Fractures of definitive teeth                                                                                                                                                                                                                                                                                                                                                                                                                                                                                                                                                                                                                                                                                                                                                                                                                                                                                                                                                                                                                                                                                                                                                                                                                                                                                                                                                                                                                                                                                                                                                                                                                                                                                                                                                                                                                                                                                                                                                                                                                                                                                                                                                                                   | <input type="checkbox"/> Lump on the face                     |                                        |                                            |                                               |                                        |                                 |                                                          |                                      |                                                                          |                                     |                                                        |                                           |                                                 |                                             |                                                    |                                                               |                                        |                                 |                                                                                                                                                                                                                                                                                                                                                                                                                                                                                                                                                                                                                                                                                                                                                                                                                                                                                                                                                                                                                                                                                                                                                                                                                                                                                                                                                                                                                                                                                                                                                                                                                                                                                                                                                                                                                                                                                                                                                                                                                                                                                                                                                                                                                             |                                     |                                        |                                            |                                               |                                        |                                 |                                                          |                                      |                                                                          |                                     |                                                        |                                           |                                                 |                                             |                                                    |                                                               |                                        |                                 |
| <input type="checkbox"/> Changes in tooth color                                                                                                                                                                                                                                                                                                                                                                                                                                                                                                                                                                                                                                                                                                                                                                                                                                                                                                                                                                                                                                                                                                                                                                                                                                                                                                                                                                                                                                                                                                                                                                                                                                                                                                                                                                                                                                                                                                                                                                                                                                                                                                                                                                                          | <input type="checkbox"/> Emergence of teeth                   |                                        |                                            |                                               |                                        |                                 |                                                          |                                      |                                                                          |                                     |                                                        |                                           |                                                 |                                             |                                                    |                                                               |                                        |                                 |                                                                                                                                                                                                                                                                                                                                                                                                                                                                                                                                                                                                                                                                                                                                                                                                                                                                                                                                                                                                                                                                                                                                                                                                                                                                                                                                                                                                                                                                                                                                                                                                                                                                                                                                                                                                                                                                                                                                                                                                                                                                                                                                                                                                                             |                                     |                                        |                                            |                                               |                                        |                                 |                                                          |                                      |                                                                          |                                     |                                                        |                                           |                                                 |                                             |                                                    |                                                               |                                        |                                 |
| <input type="checkbox"/> Problems in size or shape                                                                                                                                                                                                                                                                                                                                                                                                                                                                                                                                                                                                                                                                                                                                                                                                                                                                                                                                                                                                                                                                                                                                                                                                                                                                                                                                                                                                                                                                                                                                                                                                                                                                                                                                                                                                                                                                                                                                                                                                                                                                                                                                                                                       | <input type="checkbox"/> Some definitive tooth has fallen out |                                        |                                            |                                               |                                        |                                 |                                                          |                                      |                                                                          |                                     |                                                        |                                           |                                                 |                                             |                                                    |                                                               |                                        |                                 |                                                                                                                                                                                                                                                                                                                                                                                                                                                                                                                                                                                                                                                                                                                                                                                                                                                                                                                                                                                                                                                                                                                                                                                                                                                                                                                                                                                                                                                                                                                                                                                                                                                                                                                                                                                                                                                                                                                                                                                                                                                                                                                                                                                                                             |                                     |                                        |                                            |                                               |                                        |                                 |                                                          |                                      |                                                                          |                                     |                                                        |                                           |                                                 |                                             |                                                    |                                                               |                                        |                                 |
| <input type="checkbox"/> Crooked teeth                                                                                                                                                                                                                                                                                                                                                                                                                                                                                                                                                                                                                                                                                                                                                                                                                                                                                                                                                                                                                                                                                                                                                                                                                                                                                                                                                                                                                                                                                                                                                                                                                                                                                                                                                                                                                                                                                                                                                                                                                                                                                                                                                                                                   | <input type="checkbox"/> Others                               |                                        |                                            |                                               |                                        |                                 |                                                          |                                      |                                                                          |                                     |                                                        |                                           |                                                 |                                             |                                                    |                                                               |                                        |                                 |                                                                                                                                                                                                                                                                                                                                                                                                                                                                                                                                                                                                                                                                                                                                                                                                                                                                                                                                                                                                                                                                                                                                                                                                                                                                                                                                                                                                                                                                                                                                                                                                                                                                                                                                                                                                                                                                                                                                                                                                                                                                                                                                                                                                                             |                                     |                                        |                                            |                                               |                                        |                                 |                                                          |                                      |                                                                          |                                     |                                                        |                                           |                                                 |                                             |                                                    |                                                               |                                        |                                 |
| <p><b>4.-Have you had pain or any problems in your mouth in these last three months that have prevented you from resting or sleeping well?</b></p> <p> <input type="checkbox"/> Yes<br/> <input type="checkbox"/> No         </p> <p>If your answer is YES:</p> <p>How has this problem affected your life?</p> <p> <input type="checkbox"/> Almost nothing    <input type="checkbox"/> Something    <input type="checkbox"/> A Lot         </p> <p>How many times have you had this problem?</p> <p> <input type="checkbox"/> Once or twice a month<br/> <input type="checkbox"/> Three or more times a month, or once or twice a week<br/> <input type="checkbox"/> Three or more per week         </p> <p>If you have had this problem in your mouth less than once a month, during how many days occurred it in total?</p> <p> <input type="checkbox"/> 1-7 days<br/> <input type="checkbox"/> 8-15 days<br/> <input type="checkbox"/> 15 days or more         </p> <p>Mark with a cross what you think has kept you from resting or sleeping well in the last few months:</p> <table style="width: 100%;"> <tr> <td><input type="checkbox"/> Teeth pain</td> <td><input type="checkbox"/> Bleeding gums</td> </tr> <tr> <td><input type="checkbox"/> Teeth sensitivity</td> <td><input type="checkbox"/> Swelling of the gums</td> </tr> <tr> <td><input type="checkbox"/> Decayed teeth</td> <td><input type="checkbox"/> Tartar</td> </tr> <tr> <td><input type="checkbox"/> Baby teeth that have fallen out</td> <td><input type="checkbox"/> Mouth sores</td> </tr> <tr> <td><input type="checkbox"/> Hollows because the baby teeth did not come out</td> <td><input type="checkbox"/> Bad breath</td> </tr> <tr> <td><input type="checkbox"/> Fractures of definitive teeth</td> <td><input type="checkbox"/> Lump on the face</td> </tr> <tr> <td><input type="checkbox"/> Changes in tooth color</td> <td><input type="checkbox"/> Emergence of teeth</td> </tr> <tr> <td><input type="checkbox"/> Problems in size or shape</td> <td><input type="checkbox"/> Some definitive tooth has fallen out</td> </tr> <tr> <td><input type="checkbox"/> Crooked teeth</td> <td><input type="checkbox"/> Others</td> </tr> </table> | <input type="checkbox"/> Teeth pain                           | <input type="checkbox"/> Bleeding gums | <input type="checkbox"/> Teeth sensitivity | <input type="checkbox"/> Swelling of the gums | <input type="checkbox"/> Decayed teeth | <input type="checkbox"/> Tartar | <input type="checkbox"/> Baby teeth that have fallen out | <input type="checkbox"/> Mouth sores | <input type="checkbox"/> Hollows because the baby teeth did not come out | <input type="checkbox"/> Bad breath | <input type="checkbox"/> Fractures of definitive teeth | <input type="checkbox"/> Lump on the face | <input type="checkbox"/> Changes in tooth color | <input type="checkbox"/> Emergence of teeth | <input type="checkbox"/> Problems in size or shape | <input type="checkbox"/> Some definitive tooth has fallen out | <input type="checkbox"/> Crooked teeth | <input type="checkbox"/> Others | <p><b>8.- In these last three months, have you ever not been able to go and play with your friends because your teeth hurt?</b></p> <p> <input type="checkbox"/> Yes<br/> <input type="checkbox"/> No         </p> <p>If your answer is YES:</p> <p>How has this problem affected your life?</p> <p> <input type="checkbox"/> Almost nothing    <input type="checkbox"/> Something    <input type="checkbox"/> A Lot         </p> <p>How many times have you had this problem?</p> <p> <input type="checkbox"/> Once or twice a month<br/> <input type="checkbox"/> Three or more times a month, or once or twice a week<br/> <input type="checkbox"/> Three or more per week         </p> <p>If you have had this problem to play less than once a month, during how many days occurred it in total?</p> <p> <input type="checkbox"/> 1-7 days<br/> <input type="checkbox"/> 8-15 days<br/> <input type="checkbox"/> 15 days or more         </p> <p>Mark with a cross what you think has kept you from going and play with your friends in the last few months:</p> <table style="width: 100%;"> <tr> <td><input type="checkbox"/> Teeth pain</td> <td><input type="checkbox"/> Bleeding gums</td> </tr> <tr> <td><input type="checkbox"/> Teeth sensitivity</td> <td><input type="checkbox"/> Swelling of the gums</td> </tr> <tr> <td><input type="checkbox"/> Decayed teeth</td> <td><input type="checkbox"/> Tartar</td> </tr> <tr> <td><input type="checkbox"/> Baby teeth that have fallen out</td> <td><input type="checkbox"/> Mouth sores</td> </tr> <tr> <td><input type="checkbox"/> Hollows because the baby teeth did not come out</td> <td><input type="checkbox"/> Bad breath</td> </tr> <tr> <td><input type="checkbox"/> Fractures of definitive teeth</td> <td><input type="checkbox"/> Lump on the face</td> </tr> <tr> <td><input type="checkbox"/> Changes in tooth color</td> <td><input type="checkbox"/> Emergence of teeth</td> </tr> <tr> <td><input type="checkbox"/> Problems in size or shape</td> <td><input type="checkbox"/> Some definitive tooth has fallen out</td> </tr> <tr> <td><input type="checkbox"/> Crooked teeth</td> <td><input type="checkbox"/> Others</td> </tr> </table> | <input type="checkbox"/> Teeth pain | <input type="checkbox"/> Bleeding gums | <input type="checkbox"/> Teeth sensitivity | <input type="checkbox"/> Swelling of the gums | <input type="checkbox"/> Decayed teeth | <input type="checkbox"/> Tartar | <input type="checkbox"/> Baby teeth that have fallen out | <input type="checkbox"/> Mouth sores | <input type="checkbox"/> Hollows because the baby teeth did not come out | <input type="checkbox"/> Bad breath | <input type="checkbox"/> Fractures of definitive teeth | <input type="checkbox"/> Lump on the face | <input type="checkbox"/> Changes in tooth color | <input type="checkbox"/> Emergence of teeth | <input type="checkbox"/> Problems in size or shape | <input type="checkbox"/> Some definitive tooth has fallen out | <input type="checkbox"/> Crooked teeth | <input type="checkbox"/> Others |
| <input type="checkbox"/> Teeth pain                                                                                                                                                                                                                                                                                                                                                                                                                                                                                                                                                                                                                                                                                                                                                                                                                                                                                                                                                                                                                                                                                                                                                                                                                                                                                                                                                                                                                                                                                                                                                                                                                                                                                                                                                                                                                                                                                                                                                                                                                                                                                                                                                                                                      | <input type="checkbox"/> Bleeding gums                        |                                        |                                            |                                               |                                        |                                 |                                                          |                                      |                                                                          |                                     |                                                        |                                           |                                                 |                                             |                                                    |                                                               |                                        |                                 |                                                                                                                                                                                                                                                                                                                                                                                                                                                                                                                                                                                                                                                                                                                                                                                                                                                                                                                                                                                                                                                                                                                                                                                                                                                                                                                                                                                                                                                                                                                                                                                                                                                                                                                                                                                                                                                                                                                                                                                                                                                                                                                                                                                                                             |                                     |                                        |                                            |                                               |                                        |                                 |                                                          |                                      |                                                                          |                                     |                                                        |                                           |                                                 |                                             |                                                    |                                                               |                                        |                                 |
| <input type="checkbox"/> Teeth sensitivity                                                                                                                                                                                                                                                                                                                                                                                                                                                                                                                                                                                                                                                                                                                                                                                                                                                                                                                                                                                                                                                                                                                                                                                                                                                                                                                                                                                                                                                                                                                                                                                                                                                                                                                                                                                                                                                                                                                                                                                                                                                                                                                                                                                               | <input type="checkbox"/> Swelling of the gums                 |                                        |                                            |                                               |                                        |                                 |                                                          |                                      |                                                                          |                                     |                                                        |                                           |                                                 |                                             |                                                    |                                                               |                                        |                                 |                                                                                                                                                                                                                                                                                                                                                                                                                                                                                                                                                                                                                                                                                                                                                                                                                                                                                                                                                                                                                                                                                                                                                                                                                                                                                                                                                                                                                                                                                                                                                                                                                                                                                                                                                                                                                                                                                                                                                                                                                                                                                                                                                                                                                             |                                     |                                        |                                            |                                               |                                        |                                 |                                                          |                                      |                                                                          |                                     |                                                        |                                           |                                                 |                                             |                                                    |                                                               |                                        |                                 |
| <input type="checkbox"/> Decayed teeth                                                                                                                                                                                                                                                                                                                                                                                                                                                                                                                                                                                                                                                                                                                                                                                                                                                                                                                                                                                                                                                                                                                                                                                                                                                                                                                                                                                                                                                                                                                                                                                                                                                                                                                                                                                                                                                                                                                                                                                                                                                                                                                                                                                                   | <input type="checkbox"/> Tartar                               |                                        |                                            |                                               |                                        |                                 |                                                          |                                      |                                                                          |                                     |                                                        |                                           |                                                 |                                             |                                                    |                                                               |                                        |                                 |                                                                                                                                                                                                                                                                                                                                                                                                                                                                                                                                                                                                                                                                                                                                                                                                                                                                                                                                                                                                                                                                                                                                                                                                                                                                                                                                                                                                                                                                                                                                                                                                                                                                                                                                                                                                                                                                                                                                                                                                                                                                                                                                                                                                                             |                                     |                                        |                                            |                                               |                                        |                                 |                                                          |                                      |                                                                          |                                     |                                                        |                                           |                                                 |                                             |                                                    |                                                               |                                        |                                 |
| <input type="checkbox"/> Baby teeth that have fallen out                                                                                                                                                                                                                                                                                                                                                                                                                                                                                                                                                                                                                                                                                                                                                                                                                                                                                                                                                                                                                                                                                                                                                                                                                                                                                                                                                                                                                                                                                                                                                                                                                                                                                                                                                                                                                                                                                                                                                                                                                                                                                                                                                                                 | <input type="checkbox"/> Mouth sores                          |                                        |                                            |                                               |                                        |                                 |                                                          |                                      |                                                                          |                                     |                                                        |                                           |                                                 |                                             |                                                    |                                                               |                                        |                                 |                                                                                                                                                                                                                                                                                                                                                                                                                                                                                                                                                                                                                                                                                                                                                                                                                                                                                                                                                                                                                                                                                                                                                                                                                                                                                                                                                                                                                                                                                                                                                                                                                                                                                                                                                                                                                                                                                                                                                                                                                                                                                                                                                                                                                             |                                     |                                        |                                            |                                               |                                        |                                 |                                                          |                                      |                                                                          |                                     |                                                        |                                           |                                                 |                                             |                                                    |                                                               |                                        |                                 |
| <input type="checkbox"/> Hollows because the baby teeth did not come out                                                                                                                                                                                                                                                                                                                                                                                                                                                                                                                                                                                                                                                                                                                                                                                                                                                                                                                                                                                                                                                                                                                                                                                                                                                                                                                                                                                                                                                                                                                                                                                                                                                                                                                                                                                                                                                                                                                                                                                                                                                                                                                                                                 | <input type="checkbox"/> Bad breath                           |                                        |                                            |                                               |                                        |                                 |                                                          |                                      |                                                                          |                                     |                                                        |                                           |                                                 |                                             |                                                    |                                                               |                                        |                                 |                                                                                                                                                                                                                                                                                                                                                                                                                                                                                                                                                                                                                                                                                                                                                                                                                                                                                                                                                                                                                                                                                                                                                                                                                                                                                                                                                                                                                                                                                                                                                                                                                                                                                                                                                                                                                                                                                                                                                                                                                                                                                                                                                                                                                             |                                     |                                        |                                            |                                               |                                        |                                 |                                                          |                                      |                                                                          |                                     |                                                        |                                           |                                                 |                                             |                                                    |                                                               |                                        |                                 |
| <input type="checkbox"/> Fractures of definitive teeth                                                                                                                                                                                                                                                                                                                                                                                                                                                                                                                                                                                                                                                                                                                                                                                                                                                                                                                                                                                                                                                                                                                                                                                                                                                                                                                                                                                                                                                                                                                                                                                                                                                                                                                                                                                                                                                                                                                                                                                                                                                                                                                                                                                   | <input type="checkbox"/> Lump on the face                     |                                        |                                            |                                               |                                        |                                 |                                                          |                                      |                                                                          |                                     |                                                        |                                           |                                                 |                                             |                                                    |                                                               |                                        |                                 |                                                                                                                                                                                                                                                                                                                                                                                                                                                                                                                                                                                                                                                                                                                                                                                                                                                                                                                                                                                                                                                                                                                                                                                                                                                                                                                                                                                                                                                                                                                                                                                                                                                                                                                                                                                                                                                                                                                                                                                                                                                                                                                                                                                                                             |                                     |                                        |                                            |                                               |                                        |                                 |                                                          |                                      |                                                                          |                                     |                                                        |                                           |                                                 |                                             |                                                    |                                                               |                                        |                                 |
| <input type="checkbox"/> Changes in tooth color                                                                                                                                                                                                                                                                                                                                                                                                                                                                                                                                                                                                                                                                                                                                                                                                                                                                                                                                                                                                                                                                                                                                                                                                                                                                                                                                                                                                                                                                                                                                                                                                                                                                                                                                                                                                                                                                                                                                                                                                                                                                                                                                                                                          | <input type="checkbox"/> Emergence of teeth                   |                                        |                                            |                                               |                                        |                                 |                                                          |                                      |                                                                          |                                     |                                                        |                                           |                                                 |                                             |                                                    |                                                               |                                        |                                 |                                                                                                                                                                                                                                                                                                                                                                                                                                                                                                                                                                                                                                                                                                                                                                                                                                                                                                                                                                                                                                                                                                                                                                                                                                                                                                                                                                                                                                                                                                                                                                                                                                                                                                                                                                                                                                                                                                                                                                                                                                                                                                                                                                                                                             |                                     |                                        |                                            |                                               |                                        |                                 |                                                          |                                      |                                                                          |                                     |                                                        |                                           |                                                 |                                             |                                                    |                                                               |                                        |                                 |
| <input type="checkbox"/> Problems in size or shape                                                                                                                                                                                                                                                                                                                                                                                                                                                                                                                                                                                                                                                                                                                                                                                                                                                                                                                                                                                                                                                                                                                                                                                                                                                                                                                                                                                                                                                                                                                                                                                                                                                                                                                                                                                                                                                                                                                                                                                                                                                                                                                                                                                       | <input type="checkbox"/> Some definitive tooth has fallen out |                                        |                                            |                                               |                                        |                                 |                                                          |                                      |                                                                          |                                     |                                                        |                                           |                                                 |                                             |                                                    |                                                               |                                        |                                 |                                                                                                                                                                                                                                                                                                                                                                                                                                                                                                                                                                                                                                                                                                                                                                                                                                                                                                                                                                                                                                                                                                                                                                                                                                                                                                                                                                                                                                                                                                                                                                                                                                                                                                                                                                                                                                                                                                                                                                                                                                                                                                                                                                                                                             |                                     |                                        |                                            |                                               |                                        |                                 |                                                          |                                      |                                                                          |                                     |                                                        |                                           |                                                 |                                             |                                                    |                                                               |                                        |                                 |
| <input type="checkbox"/> Crooked teeth                                                                                                                                                                                                                                                                                                                                                                                                                                                                                                                                                                                                                                                                                                                                                                                                                                                                                                                                                                                                                                                                                                                                                                                                                                                                                                                                                                                                                                                                                                                                                                                                                                                                                                                                                                                                                                                                                                                                                                                                                                                                                                                                                                                                   | <input type="checkbox"/> Others                               |                                        |                                            |                                               |                                        |                                 |                                                          |                                      |                                                                          |                                     |                                                        |                                           |                                                 |                                             |                                                    |                                                               |                                        |                                 |                                                                                                                                                                                                                                                                                                                                                                                                                                                                                                                                                                                                                                                                                                                                                                                                                                                                                                                                                                                                                                                                                                                                                                                                                                                                                                                                                                                                                                                                                                                                                                                                                                                                                                                                                                                                                                                                                                                                                                                                                                                                                                                                                                                                                             |                                     |                                        |                                            |                                               |                                        |                                 |                                                          |                                      |                                                                          |                                     |                                                        |                                           |                                                 |                                             |                                                    |                                                               |                                        |                                 |
| <input type="checkbox"/> Teeth pain                                                                                                                                                                                                                                                                                                                                                                                                                                                                                                                                                                                                                                                                                                                                                                                                                                                                                                                                                                                                                                                                                                                                                                                                                                                                                                                                                                                                                                                                                                                                                                                                                                                                                                                                                                                                                                                                                                                                                                                                                                                                                                                                                                                                      | <input type="checkbox"/> Bleeding gums                        |                                        |                                            |                                               |                                        |                                 |                                                          |                                      |                                                                          |                                     |                                                        |                                           |                                                 |                                             |                                                    |                                                               |                                        |                                 |                                                                                                                                                                                                                                                                                                                                                                                                                                                                                                                                                                                                                                                                                                                                                                                                                                                                                                                                                                                                                                                                                                                                                                                                                                                                                                                                                                                                                                                                                                                                                                                                                                                                                                                                                                                                                                                                                                                                                                                                                                                                                                                                                                                                                             |                                     |                                        |                                            |                                               |                                        |                                 |                                                          |                                      |                                                                          |                                     |                                                        |                                           |                                                 |                                             |                                                    |                                                               |                                        |                                 |
| <input type="checkbox"/> Teeth sensitivity                                                                                                                                                                                                                                                                                                                                                                                                                                                                                                                                                                                                                                                                                                                                                                                                                                                                                                                                                                                                                                                                                                                                                                                                                                                                                                                                                                                                                                                                                                                                                                                                                                                                                                                                                                                                                                                                                                                                                                                                                                                                                                                                                                                               | <input type="checkbox"/> Swelling of the gums                 |                                        |                                            |                                               |                                        |                                 |                                                          |                                      |                                                                          |                                     |                                                        |                                           |                                                 |                                             |                                                    |                                                               |                                        |                                 |                                                                                                                                                                                                                                                                                                                                                                                                                                                                                                                                                                                                                                                                                                                                                                                                                                                                                                                                                                                                                                                                                                                                                                                                                                                                                                                                                                                                                                                                                                                                                                                                                                                                                                                                                                                                                                                                                                                                                                                                                                                                                                                                                                                                                             |                                     |                                        |                                            |                                               |                                        |                                 |                                                          |                                      |                                                                          |                                     |                                                        |                                           |                                                 |                                             |                                                    |                                                               |                                        |                                 |
| <input type="checkbox"/> Decayed teeth                                                                                                                                                                                                                                                                                                                                                                                                                                                                                                                                                                                                                                                                                                                                                                                                                                                                                                                                                                                                                                                                                                                                                                                                                                                                                                                                                                                                                                                                                                                                                                                                                                                                                                                                                                                                                                                                                                                                                                                                                                                                                                                                                                                                   | <input type="checkbox"/> Tartar                               |                                        |                                            |                                               |                                        |                                 |                                                          |                                      |                                                                          |                                     |                                                        |                                           |                                                 |                                             |                                                    |                                                               |                                        |                                 |                                                                                                                                                                                                                                                                                                                                                                                                                                                                                                                                                                                                                                                                                                                                                                                                                                                                                                                                                                                                                                                                                                                                                                                                                                                                                                                                                                                                                                                                                                                                                                                                                                                                                                                                                                                                                                                                                                                                                                                                                                                                                                                                                                                                                             |                                     |                                        |                                            |                                               |                                        |                                 |                                                          |                                      |                                                                          |                                     |                                                        |                                           |                                                 |                                             |                                                    |                                                               |                                        |                                 |
| <input type="checkbox"/> Baby teeth that have fallen out                                                                                                                                                                                                                                                                                                                                                                                                                                                                                                                                                                                                                                                                                                                                                                                                                                                                                                                                                                                                                                                                                                                                                                                                                                                                                                                                                                                                                                                                                                                                                                                                                                                                                                                                                                                                                                                                                                                                                                                                                                                                                                                                                                                 | <input type="checkbox"/> Mouth sores                          |                                        |                                            |                                               |                                        |                                 |                                                          |                                      |                                                                          |                                     |                                                        |                                           |                                                 |                                             |                                                    |                                                               |                                        |                                 |                                                                                                                                                                                                                                                                                                                                                                                                                                                                                                                                                                                                                                                                                                                                                                                                                                                                                                                                                                                                                                                                                                                                                                                                                                                                                                                                                                                                                                                                                                                                                                                                                                                                                                                                                                                                                                                                                                                                                                                                                                                                                                                                                                                                                             |                                     |                                        |                                            |                                               |                                        |                                 |                                                          |                                      |                                                                          |                                     |                                                        |                                           |                                                 |                                             |                                                    |                                                               |                                        |                                 |
| <input type="checkbox"/> Hollows because the baby teeth did not come out                                                                                                                                                                                                                                                                                                                                                                                                                                                                                                                                                                                                                                                                                                                                                                                                                                                                                                                                                                                                                                                                                                                                                                                                                                                                                                                                                                                                                                                                                                                                                                                                                                                                                                                                                                                                                                                                                                                                                                                                                                                                                                                                                                 | <input type="checkbox"/> Bad breath                           |                                        |                                            |                                               |                                        |                                 |                                                          |                                      |                                                                          |                                     |                                                        |                                           |                                                 |                                             |                                                    |                                                               |                                        |                                 |                                                                                                                                                                                                                                                                                                                                                                                                                                                                                                                                                                                                                                                                                                                                                                                                                                                                                                                                                                                                                                                                                                                                                                                                                                                                                                                                                                                                                                                                                                                                                                                                                                                                                                                                                                                                                                                                                                                                                                                                                                                                                                                                                                                                                             |                                     |                                        |                                            |                                               |                                        |                                 |                                                          |                                      |                                                                          |                                     |                                                        |                                           |                                                 |                                             |                                                    |                                                               |                                        |                                 |
| <input type="checkbox"/> Fractures of definitive teeth                                                                                                                                                                                                                                                                                                                                                                                                                                                                                                                                                                                                                                                                                                                                                                                                                                                                                                                                                                                                                                                                                                                                                                                                                                                                                                                                                                                                                                                                                                                                                                                                                                                                                                                                                                                                                                                                                                                                                                                                                                                                                                                                                                                   | <input type="checkbox"/> Lump on the face                     |                                        |                                            |                                               |                                        |                                 |                                                          |                                      |                                                                          |                                     |                                                        |                                           |                                                 |                                             |                                                    |                                                               |                                        |                                 |                                                                                                                                                                                                                                                                                                                                                                                                                                                                                                                                                                                                                                                                                                                                                                                                                                                                                                                                                                                                                                                                                                                                                                                                                                                                                                                                                                                                                                                                                                                                                                                                                                                                                                                                                                                                                                                                                                                                                                                                                                                                                                                                                                                                                             |                                     |                                        |                                            |                                               |                                        |                                 |                                                          |                                      |                                                                          |                                     |                                                        |                                           |                                                 |                                             |                                                    |                                                               |                                        |                                 |
| <input type="checkbox"/> Changes in tooth color                                                                                                                                                                                                                                                                                                                                                                                                                                                                                                                                                                                                                                                                                                                                                                                                                                                                                                                                                                                                                                                                                                                                                                                                                                                                                                                                                                                                                                                                                                                                                                                                                                                                                                                                                                                                                                                                                                                                                                                                                                                                                                                                                                                          | <input type="checkbox"/> Emergence of teeth                   |                                        |                                            |                                               |                                        |                                 |                                                          |                                      |                                                                          |                                     |                                                        |                                           |                                                 |                                             |                                                    |                                                               |                                        |                                 |                                                                                                                                                                                                                                                                                                                                                                                                                                                                                                                                                                                                                                                                                                                                                                                                                                                                                                                                                                                                                                                                                                                                                                                                                                                                                                                                                                                                                                                                                                                                                                                                                                                                                                                                                                                                                                                                                                                                                                                                                                                                                                                                                                                                                             |                                     |                                        |                                            |                                               |                                        |                                 |                                                          |                                      |                                                                          |                                     |                                                        |                                           |                                                 |                                             |                                                    |                                                               |                                        |                                 |
| <input type="checkbox"/> Problems in size or shape                                                                                                                                                                                                                                                                                                                                                                                                                                                                                                                                                                                                                                                                                                                                                                                                                                                                                                                                                                                                                                                                                                                                                                                                                                                                                                                                                                                                                                                                                                                                                                                                                                                                                                                                                                                                                                                                                                                                                                                                                                                                                                                                                                                       | <input type="checkbox"/> Some definitive tooth has fallen out |                                        |                                            |                                               |                                        |                                 |                                                          |                                      |                                                                          |                                     |                                                        |                                           |                                                 |                                             |                                                    |                                                               |                                        |                                 |                                                                                                                                                                                                                                                                                                                                                                                                                                                                                                                                                                                                                                                                                                                                                                                                                                                                                                                                                                                                                                                                                                                                                                                                                                                                                                                                                                                                                                                                                                                                                                                                                                                                                                                                                                                                                                                                                                                                                                                                                                                                                                                                                                                                                             |                                     |                                        |                                            |                                               |                                        |                                 |                                                          |                                      |                                                                          |                                     |                                                        |                                           |                                                 |                                             |                                                    |                                                               |                                        |                                 |
| <input type="checkbox"/> Crooked teeth                                                                                                                                                                                                                                                                                                                                                                                                                                                                                                                                                                                                                                                                                                                                                                                                                                                                                                                                                                                                                                                                                                                                                                                                                                                                                                                                                                                                                                                                                                                                                                                                                                                                                                                                                                                                                                                                                                                                                                                                                                                                                                                                                                                                   | <input type="checkbox"/> Others                               |                                        |                                            |                                               |                                        |                                 |                                                          |                                      |                                                                          |                                     |                                                        |                                           |                                                 |                                             |                                                    |                                                               |                                        |                                 |                                                                                                                                                                                                                                                                                                                                                                                                                                                                                                                                                                                                                                                                                                                                                                                                                                                                                                                                                                                                                                                                                                                                                                                                                                                                                                                                                                                                                                                                                                                                                                                                                                                                                                                                                                                                                                                                                                                                                                                                                                                                                                                                                                                                                             |                                     |                                        |                                            |                                               |                                        |                                 |                                                          |                                      |                                                                          |                                     |                                                        |                                           |                                                 |                                             |                                                    |                                                               |                                        |                                 |

Manuscript ID: ijerph-1932941

## SUPPLEMENTARY MATERIALS:

FIGURE S1: CHILD-ORAL IMPACTS ON DAILY PERFORMANCES questionnaire
